# Supplementary material for: Exposure to air pollution and respiratory symptoms during the first 7 years of life in an Italian birth cohort
Source: PubMed Central journal article supplement — Occup Environ Med. 2014 Mar 21;71(6):430–6. doi: 10.1136/oemed-2013-101867 (PMC4033119; doi:10.1136/oemed-2013-101867), 2014-03-21

Rome municipality with the high traffic roads (HTR) network, the geo-coded addresses of GASPII cohort at birth, and the results of LUR model for NO<sub>2</sub> (brown colour)

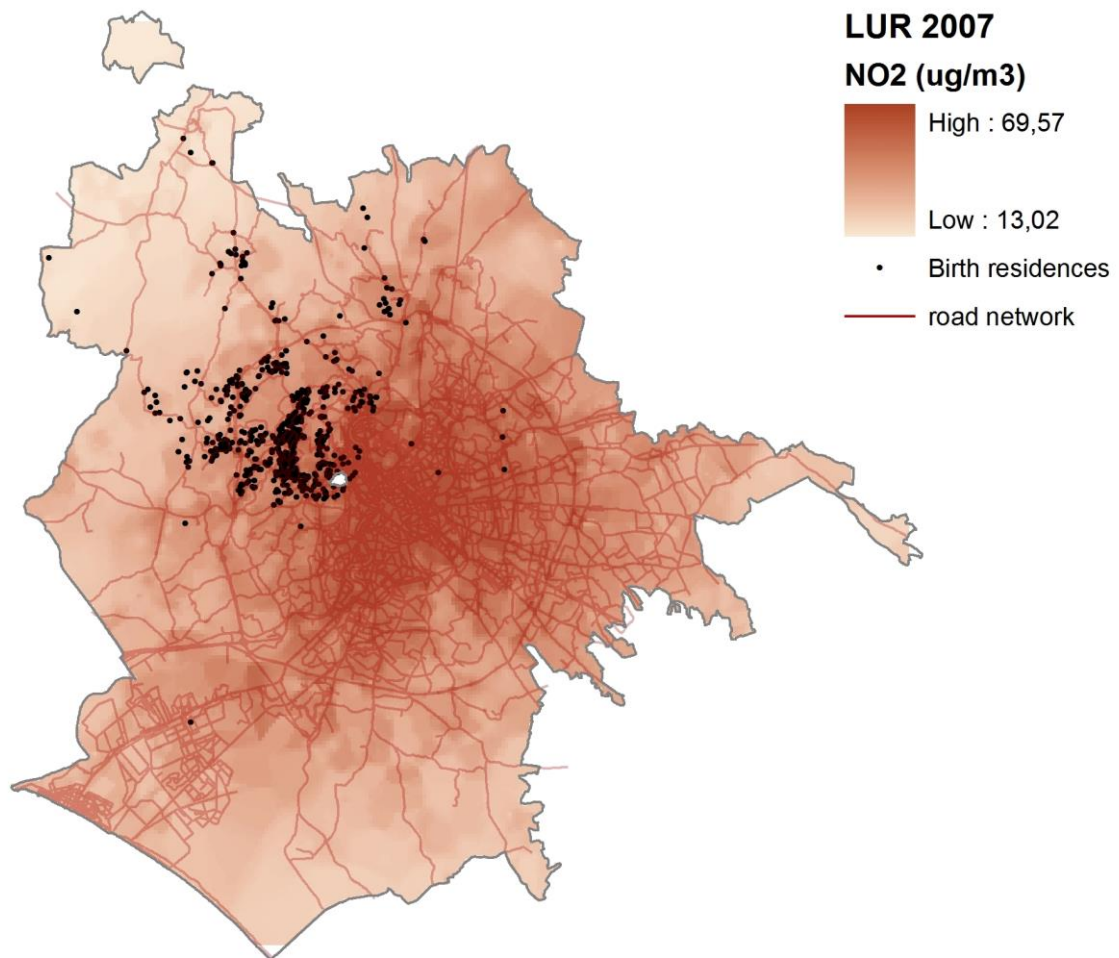

Supplement: oemed-2013-101867-s2.pdf [file oemed-2013-101867-s2.pdf]
